# Supplementary material for: Cortical Morphometric Abnormality and Its Association with Working Memory in Children with Attention-Deficit/Hyperactivity Disorder
Source: PubMed Central journal article supplement — Psychiatry Investig. 2021 Jul 22;18(7):679–87. doi: 10.30773/pi.2020.0333 (PMC8328834; doi:10.30773/pi.2020.0333), 2021-07-22
Supplement: pi-2020-0333-suppl1.pdf [file pi-2020-0333-suppl1.pdf]

**Supplementary Table 1.** Estimated regression parameters, standard errors, t values, and p-values for the group differences in cortical surface

|                                                              | Estimate | Std.error | t value | p-value <sup>a</sup> |
|--------------------------------------------------------------|----------|-----------|---------|----------------------|
| Right hemisphere                                             |          |           |         |                      |
| Anterior cingulate cortex                                    | 6.500    | 2.932     | 2.217   | 0.031                |
| Supramarginal gyrus                                          | 5.108    | 1.874     | 2.725   | 0.009                |
| Pericallosal sulcus                                          | 8.324    | 3.272     | 2.544   | 0.014                |
| Left hemisphere                                              |          |           |         |                      |
| Anterior cingulate cortex                                    | 8.254    | 2.545     | 3.244   | 0.002                |
| Middle-anterior part of anterior cingulate cortex and sulcus | 8.971    | 3.375     | 2.658   | 0.010                |
| Lateral aspect of the superior temporal gyrus                | 1.374    | 4.420     | 3.110   | 0.003                |
| Inferior segment of the circular sulcus of the insula        | 1.719    | 5.920     | 2.904   | 0.005                |
| Parieto-occipital sulcus                                     | 5.936    | 2.711     | 2.190   | 0.003                |

<sup>a</sup>age, sex, full-scale intelligence quotient (FSIQ) and total intracranial volume (ICV) as covariates. All p-values implied uncorrected p-values
