# Supplementary material for: Cortical Morphometric Abnormality and Its Association with Working Memory in Children with Attention-Deficit/Hyperactivity Disorder
Source: PubMed Central journal article supplement — Psychiatry Investig. 2021 Jul 22;18(7):679–87. doi: 10.30773/pi.2020.0333 (PMC8328834; doi:10.30773/pi.2020.0333), 2021-07-22
Supplement: pi-2020-0333-suppl2.pdf [file pi-2020-0333-suppl2.pdf]

**Supplementary Table 2.** Estimated regression parameters, standard errors, t values, and p-values for the group differences in thickness

|                                                  | Estimate | Std.error | t value | p-value <sup>a</sup> |
|--------------------------------------------------|----------|-----------|---------|----------------------|
| Right hemisphere                                 |          |           |         |                      |
| Inferior temporal gyrus                          | 1.074    | 3.315     | 3.241   | 0.002                |
| Middle temporal gyrus                            | 6.970    | 2.896     | 2.406   | 0.020                |
| Inferior frontal sulcus                          | 7.687    | 3.147     | 2.443   | 0.018                |
| Anterior occipital sulcus and preoccipital notch | 9.036    | 3.253     | 2.778   | 0.007                |
| Inferior temporal sulcus                         | 8.269    | 2.615     | 3.162   | 0.003                |
| Left hemisphere                                  |          |           |         |                      |
| Short insular gyri                               | 7.648    | 3.177     | 2.407   | 0.020                |
| Lateral aspect of the superior temporal gyrus    | 7.167    | 2.875     | 2.493   | 0.016                |

<sup>a</sup>age, sex, full-scale intelligence quotient (FSIQ) and total intracranial volume (ICV) as covariates. All p-values implied uncorrected p-values
