# Supplementary material for: Cortical Morphometric Abnormality and Its Association with Working Memory in Children with Attention-Deficit/Hyperactivity Disorder
Source: PubMed Central journal article supplement — Psychiatry Investig. 2021 Jul 22;18(7):679–87. doi: 10.30773/pi.2020.0333 (PMC8328834; doi:10.30773/pi.2020.0333), 2021-07-22
Supplement: pi-2020-0333-suppl3.pdf [file pi-2020-0333-suppl3.pdf]

**Supplementary Table 3.** Estimated regression parameters, standard errors, t values, and p-values for the group differences in cortical curvature

|                                                  | Estimate | Std.error | t value | p-value <sup>a</sup> |
|--------------------------------------------------|----------|-----------|---------|----------------------|
| Right orbital part of the inferior frontal gyrus | 5.934    | 2.249     | 2.639   | 0.011                |

<sup>a</sup>age, sex, full-scale intelligence quotient (FSIQ) and total intracranial volume (ICV) as covariates. All p-values implied uncorrected p-values
