# Supplementary material for: Cortical Morphometric Abnormality and Its Association with Working Memory in Children with Attention-Deficit/Hyperactivity Disorder
Source: PubMed Central journal article supplement — Psychiatry Investig. 2021 Jul 22;18(7):679–87. doi: 10.30773/pi.2020.0333 (PMC8328834; doi:10.30773/pi.2020.0333), 2021-07-22
Supplement: pi-2020-0333-suppl4.pdf [file pi-2020-0333-suppl4.pdf]

**Supplementary Table 4.** The group differences in cortical volume among ADHD-I subtypes, ADHD-C subtypes and healthy controls

|                                                    | F      | P <sup>a</sup>         | ADHD-I vs. HC<br>(p <sup>a</sup> ) | ADHD-C vs. HC<br>(p <sup>a</sup> ) | ADHD-I vs. ADHD-C<br>(p <sup>a</sup> ) |
|----------------------------------------------------|--------|------------------------|------------------------------------|------------------------------------|----------------------------------------|
| Left lateral aspect of the superior temporal gyrus | 13.369 | 1.40×10 <sup>-5*</sup> | 4.13×10 <sup>-4*</sup>             | 1.25×10 <sup>-4*</sup>             | 1.000                                  |

<sup>a</sup>age, sex, full-scale intelligence quotient (FSIQ) and total intracranial volume (ICV) as covariates. \*p survived Bonferroni corrections. ADHD-I: attention-deficit/hyperactivity disorder inattentive type, ADHD-C: attention-deficit/hyperactivity disorder combined type, HC: healthy controls
