# Supplementary material for: Cortical Morphometric Abnormality and Its Association with Working Memory in Children with Attention-Deficit/Hyperactivity Disorder
Source: PubMed Central journal article supplement — Psychiatry Investig. 2021 Jul 22;18(7):679–87. doi: 10.30773/pi.2020.0333 (PMC8328834; doi:10.30773/pi.2020.0333), 2021-07-22
Supplement: pi-2020-0333-suppl5.pdf [file pi-2020-0333-suppl5.pdf]

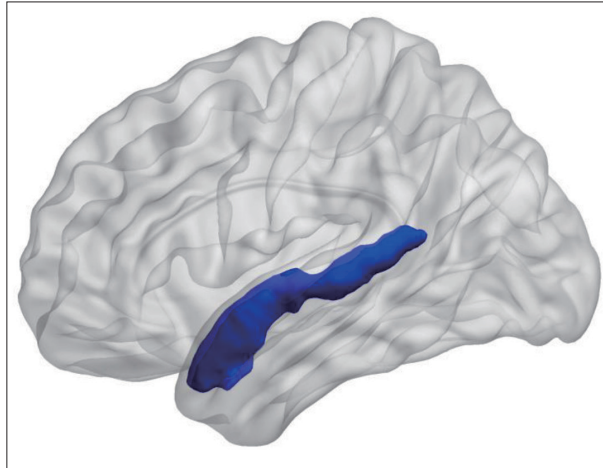

**Supplementary Figure 1.** The significant region of left lateral aspect of the superior temporal gyrus from F or post-hoc tests (both subgroups of ADHD vs. HC) is represented in blue color. The map is visualized by BrainNet Viewer version 1.7 ([www.nitrc.org/projects/bnv/](http://www.nitrc.org/projects/bnv/)). ADHD: attention-deficit/hyperactivity disorder, HC: healthy controls.
